# Supplementary material
Source: publisher figshare collection journal article supplement (https://sage.figshare.com/ndownloader/files/16986815)
Supplement: Supplementary file 1 [file 16986815]

## Sheet: Sheet1
Unique sample ID	Laboratory code	Number of subsamples	Age (14C a BP)	Age uncertainty (14C a)	Bulk error (14C a)	δ13C (‰)	Assumed or measured	Isotopic fractionation correction (14C a)	Isotopic fractionation uncertainty (14C a)	Corrected age (14C a BP)	Corrected age uncertainty (14C a)	ΔR (14C a)	Reservoir age error (14C a)	Calibration software	Age (cal a BP)	Age 2σ Uncertainty + (cal a)	Age 2σ Uncertainty - (cal a)
1	2	3	4	5	6	7	8	9	10	11	12	13	14	15	16	17	18
PärnuRB15-05-1	Beta-456806	1	7540	30	nd	-24.8	measured	n/a	n/a	7540	30	n/a	n/a	OxCal	8370	38	45
PärnuRB15-05-2	Beta-456807	1	7860	30	nd	-25	measured	n/a	n/a	7860	30	n/a	n/a	OxCal	8630	133	47
PärnuRB15-05-3	Beta-456808	1	7510	30	nd	-27.4	measured	n/a	n/a	7510	30	n/a	n/a	OxCal	8350	42	139
PärnuRB15-05-4	Beta-456809	1	8390	30	nd	-27	measured	n/a	n/a	8390	30	n/a	n/a	OxCal	9440	47	132
PärnuRB15-05-5	Beta-456810	1	9430	40	nd	-24.8	measured	n/a	n/a	9430	40	n/a	n/a	OxCal	10660	100	94
Pärnu2 (5K-18)	Beta-492458	1	8070	40	nd	-27.1	measured	n/a	n/a	8070	40	n/a	n/a	OxCal	9000	121	222
Lõpe1	Tln-1631	1	9215	70	nd	-25	assumed	n/a	n/a	9215	70	n/a	n/a	OxCal	10390	169	149
Lõpe2	Tln-1632	1	9260	70	nd	-25	assumed	n/a	n/a	9260	70	n/a	n/a	OxCal	10440	206	192
Pressi	Tln-1991	1	9135	70	nd	-25	assumed	n/a	n/a	9135	70	n/a	n/a	OxCal	10320	176	124
Kõdu1	Tln-66	1	8480	90	nd	-25	assumed	n/a	n/a	8480	90	n/a	n/a	OxCal	9480	179	208
Kõdu2	Tln-1993	1	9340	45	nd	-25	assumed	n/a	n/a	9340	45	n/a	n/a	OxCal	10560	128	139
Paikuse 1	Ta-2547	1	9575	90	nd	-27	assumed	n/a	n/a	9575	90	n/a	n/a	OxCal	10930	260	265
Paikuse 2	Ua-11691	1	9350	75	nd	-28.97	measured	n/a	n/a	9350	75	n/a	n/a	OxCal	10560	188	264
Paikuse 3	Ua-12446	1	9340	130	nd	-26.8	measured	n/a	n/a	9340	130	n/a	n/a	OxCal	10560	513	322
Paikuse 4	Tln-2603	1	7535	80	nd	-27	assumed	n/a	n/a	7535	80	n/a	n/a	OxCal	8340	172	161
Paikuse 5	Ua-12447	1	7120	120	nd	-27.36	measured	n/a	n/a	7120	120	n/a	n/a	OxCal	7940	236	242
Paikuse 6	Ta-2548	1	7030	120	nd	-27	assumed	n/a	n/a	7030	120	n/a	n/a	OxCal	7860	291	241
Pulli 1	Ua-13352	1	9095	90	nd	-25	assumed	n/a	n/a	9095	90	n/a	n/a	OxCal	10270	245	335
Pulli 2	Ua-13351	1	9385	105	nd	-25	assumed	n/a	n/a	9385	105	n/a	n/a	OxCal	10620	454	344
Pulli 3	Ua-13353	1	9145	115	nd	-25	assumed	n/a	n/a	9145	115	n/a	n/a	OxCal	10340	315	400
Pulli 4	Ta-176	1	9575	115	nd	-25	assumed	n/a	n/a	9575	115	n/a	n/a	OxCal	10920	283	331
Pulli 5	Ta-175	1	9300	75	nd	-25	assumed	n/a	n/a	9300	75	n/a	n/a	OxCal	10490	190	220
Pulli 6	Ta-949	1	9350	60	nd	-25	assumed	n/a	n/a	9350	60	n/a	n/a	OxCal	10570	161	265
Pulli 7	Ta-245	1	9600	120	nd	-25	assumed	n/a	n/a	9600	120	n/a	n/a	OxCal	10940	285	346
Pulli 8	Ta-284	1	9285	120	nd	-25	assumed	n/a	n/a	9285	120	n/a	n/a	OxCal	10480	579	265
Pulli 9	Hel-2206A	1	9620	120	nd	-25	assumed	n/a	n/a	9620	120	n/a	n/a	OxCal	10950	288	346
Pulli 10	Hel-2206B	1	9290	120	nd	-25	assumed	n/a	n/a	9290	120	n/a	n/a	OxCal	10490	571	269
Võidu 1	Ta-77	1	9100	125	nd	-25	assumed	n/a	n/a	9100	125	n/a	n/a	OxCal	10280	368	387
Võidu 2	Poz-59453	1	9180	50	nd	-25	assumed	n/a	n/a	9180	50	n/a	n/a	OxCal	10340	152	102
Võidu 3	Poz-59454	1	9290	50	nd	-25	assumed	n/a	n/a	9290	50	n/a	n/a	OxCal	10480	168	194
Urge	Tln-1691	1	9125	85	nd	-25	assumed	n/a	n/a	9125	85	n/a	n/a	OxCal	10320	233	155
Uku PA-3	Tln-1187	1	7910	90	nd	-25	assumed	n/a	n/a	7910	90	n/a	n/a	OxCal	8760	245	212
Uku-1-03 1	Ta-2828	1	8030	180	nd	-25	assumed	n/a	n/a	8030	180	n/a	n/a	OxCal	8920	503	439
Uku-1-03 2	Ta-2829	1	8270	120	nd	-25	assumed	n/a	n/a	8270	120	n/a	n/a	OxCal	9250	252	250
Uku-1-03 3	Ta-2830	1	8080	150	nd	-25	assumed	n/a	n/a	8080	150	n/a	n/a	OxCal	8990	417	394
Uku-1-03 4	Ta-2831	1	8420	150	nd	-25	assumed	n/a	n/a	8420	150	n/a	n/a	OxCal	9390	342	378
Uku-1-03 5	Ta-2832	1	7580	120	nd	-25	assumed	n/a	n/a	7580	120	n/a	n/a	OxCal	8390	241	316
Uku-1-03 6	Ta-2833	1	7250	150	nd	-25	assumed	n/a	n/a	7250	150	n/a	n/a	OxCal	8080	295	285
Uku-1-03 7	Ta-2834	1	7610	180	nd	-25	assumed	n/a	n/a	7610	180	n/a	n/a	OxCal	8430	544	398
Uku-1-03 8	Ta-2835	1	7440	150	nd	-25	assumed	n/a	n/a	7440	150	n/a	n/a	OxCal	8250	287	276
Pauka bird figurine	Beta-286994	1	7040	40	nd	-22.7	measured	n/a	n/a	7040	40	n/a	n/a	OxCal	7880	75	89
Pauka human figurine	Beta-317861	1	7240	40	nd	-21.4	measured	n/a	n/a	7240	40	n/a	n/a	OxCal	8060	103	82
Reiu 1	Ta-2836	1	7175	100	nd	-25	assumed	n/a	n/a	7175	100	n/a	n/a	OxCal	8000	198	212
Reiu 2	Ta-2837	1	7570	150	nd	-25	assumed	n/a	n/a	7570	150	n/a	n/a	OxCal	8380	321	358
Reiu 3	Ta-2838	1	7743	150	nd	-25	assumed	n/a	n/a	7743	150	n/a	n/a	OxCal	8570	430	351
Reiu 4	Ta-2839	1	7560	150	nd	-25	assumed	n/a	n/a	7560	150	n/a	n/a	OxCal	8370	325	353
Reiu 5	Ta-2840	1	7730	150	nd	-25	assumed	n/a	n/a	7730	150	n/a	n/a	OxCal	8550	445	335
Reiu 6	Ta-2841	1	7800	150	nd	-25	assumed	n/a	n/a	7800	150	n/a	n/a	OxCal	8640	377	292
Reiu 7	Ta-2842	1	8320	150	nd	-25	assumed	n/a	n/a	8320	150	n/a	n/a	OxCal	9290	293	497
Reiu 8	Ta-2843	1	8570	150	nd	-25	assumed	n/a	n/a	8570	150	n/a	n/a	OxCal	9600	553	342
Sindi-Lodja I 1	Ua-17013	1	8070	70	nd	-25	assumed	n/a	n/a	8070	70	n/a	n/a	OxCal	8980	266	320
Sindi-Lodja I 2	Ta-2826	1	7780	100	nd	-25	assumed	n/a	n/a	7780	100	n/a	n/a	OxCal	8580	396	189
Sindi-Lodja II 1	Ta-2769	1	8035	80	nd	-25	assumed	n/a	n/a	8035	80	n/a	n/a	OxCal	8890	244	261
Sindi-Lodja II 2	Ta-2784	1	9170	200	nd	-25	assumed	n/a	n/a	9170	200	n/a	n/a	OxCal	10370	702	632
Sindi-Lodja 1	Ta-2785	1	7300	150	nd	-25	assumed	n/a	n/a	7300	150	n/a	n/a	OxCal	8130	269	282
Sindi-Lodja 2	Ta-2783	1	7630	120	nd	-25	assumed	n/a	n/a	7630	120	n/a	n/a	OxCal	8440	262	263
Sindi-Lodja 3	Ta-2737	1	7780	120	nd	-25	assumed	n/a	n/a	7780	120	n/a	n/a	OxCal	8600	379	213
Sindi-Lodja 4	Ta-2774	1	7870	80	nd	-25	assumed	n/a	n/a	7870	80	n/a	n/a	OxCal	8710	282	226
Sindi-Lodja 5	Ta-2736	1	7980	100	nd	-25	assumed	n/a	n/a	7980	100	n/a	n/a	OxCal	8840	282	255
Sindi-Lodja 6	Ta-2788	1	8035	80	nd	-25	assumed	n/a	n/a	8035	80	n/a	n/a	OxCal	8890	244	261
Sindi-Lodja 7	Ta-2789	1	8190	80	nd	-25	assumed	n/a	n/a	8190	80	n/a	n/a	OxCal	9160	247	163
Sindi-Lodja 8	Ta-2786	1	8210	80	nd	-25	assumed	n/a	n/a	8210	80	n/a	n/a	OxCal	9190	219	182
Sindi-Lodja 9	Ta-2787	1	8250	150	nd	-25	assumed	n/a	n/a	8250	150	n/a	n/a	OxCal	9220	313	443
Sindi 1	Ta-55	1	6710	110	nd	-25	assumed	n/a	n/a	6710	110	n/a	n/a	OxCal	7580	209	158
Sindi 2	Ta-133	1	7215	90	nd	-25	assumed	n/a	n/a	7215	90	n/a	n/a	OxCal	8040	238	191
Sindi 3	Ta-134	1	4975	100	nd	-25	assumed	n/a	n/a	4975	100	n/a	n/a	OxCal	5726	200	241
Vaskrääma 1	Ta-140	1	7580	170	nd	-25	assumed	n/a	n/a	7580	170	n/a	n/a	OxCal	8390	542	378
Vaskrääma 2	Ta-141	1	6975	110	nd	-25	assumed	n/a	n/a	6975	110	n/a	n/a	OxCal	7810	186	196
Vaskrääma 3	Ta-139	1	6870	110	nd	-25	assumed	n/a	n/a	6870	110	n/a	n/a	OxCal	7720	218	198
Rannametsa 1	Hel-2207A	1	8080	110	nd	-25	assumed	n/a	n/a	8080	110	n/a	n/a	OxCal	8990	314	362
Rannametsa 2	Hel-2207B	1	8060	110	nd	-25	assumed	n/a	n/a	8060	110	n/a	n/a	OxCal	8940	338	331
Rannametsa 3	Tln-1994	1	7725	65	nd	-25	assumed	n/a	n/a	7725	65	n/a	n/a	OxCal	8500	126	101
Rannametsa 4	Hel-2207	1	7610	100	nd	-25	assumed	n/a	n/a	7610	100	n/a	n/a	OxCal	8420	173	220
Rannametsa 5	Poz-59452	1	7880	50	nd	-25	assumed	n/a	n/a	7880	50	n/a	n/a	OxCal	8690	276	141
Rannametsa 6	Poz-59389	1	7750	40	nd	-25	assumed	n/a	n/a	7750	40	n/a	n/a	OxCal	8530	65	99
Rannametsa 7	Ta-54	1	7960	150	nd	-25	assumed	n/a	n/a	7960	150	n/a	n/a	OxCal	8830	424	380
Rannametsa 8	Ta-2944	1	7400	150	nd	-25	assumed	n/a	n/a	7400	150	n/a	n/a	OxCal	8220	293	279
Rannametsa 9	Ta-3066	1	6860	60	nd	-25	assumed	n/a	n/a	6860	60	n/a	n/a	OxCal	7700	126	110
Metsaääre I	Beta-404516	1	7150	30	nd	-26.5	measured	n/a	n/a	7150	30	n/a	n/a	OxCal	7970	47	35
Tolkuse 1	Ta-2946	1	7410	150	nd	-25	assumed	n/a	n/a	7410	150	n/a	n/a	OxCal	8220	296	268
Tolkuse 2	Ta-2947	1	7880	100	nd	-25	assumed	n/a	n/a	7880	100	n/a	n/a	OxCal	8730	270	270
Tolkuse 3	Ta-2945	1	3800	150	nd	-25	assumed	n/a	n/a	3800	150	n/a	n/a	OxCal	4200	584	474
Tolkuse 4	Beta-397976	1	3510	30	nd	-25.9	measured	n/a	n/a	3510	30	n/a	n/a	OxCal	3780	87	83
Tolkuse 5	Poz-59388	1	3320	30	nd	-25	assumed	n/a	n/a	3320	30	n/a	n/a	OxCal	3540	92	70
Tolkuse 6	Ta-1990	1	2320	100	nd	-25	assumed	n/a	n/a	2320	100	n/a	n/a	OxCal	2360	352	236
Seliste	Ta-183	1	5950	60	nd	-25	assumed	n/a	n/a	5950	60	n/a	n/a	OxCal	6780	156	120
Kõrsa	Ta-1986	1	5790	80	nd	-25	assumed	n/a	n/a	5790	80	n/a	n/a	OxCal	6590	185	180
Lemmetsa I	Poz-58929	1	4155	35	nd	-25	assumed	n/a	n/a	4155	35	n/a	n/a	OxCal	4700	128	126
Malda	Tln-2220	1	7560	65	nd	-25	assumed	n/a	n/a	7560	65	n/a	n/a	OxCal	8371	140	172
Pärnu top boundary		1	nd	nd	nd	-25	assumed	n/a	n/a	nd	nd	n/a	n/a	OxCal	8150	100	100
Litorina highest shoreline		1	nd	nd	nd	-25	assumed	n/a	n/a	nd	nd	n/a	n/a	OxCal	10200	200	400
Ancylus Lake highest shoreline		1	nd	nd	nd	-25	assumed	n/a	n/a	nd	nd	n/a	n/a	OxCal	7300	300	nd
